# Supplementary material for: Preparation and Surface Characterization of Cerium Dioxide for Separation of 68Ge/68Ga and Other Medicinal Radionuclides
Source: MDPI journal article supplement (doi:10.3390/ma16051758), 2023-02-21
Supplement: s1 [file s1]

# Preparation and surface characterization of cerium dioxide for separation of $^{68}\text{Ge}/^{68}\text{Ga}$ and other medicinal radionuclides

Kateřina Ondrák Fialová <sup>1\*</sup>, Kryštof Adámek <sup>1</sup>, Martin Vlk <sup>1</sup>, Barbora Drtinová <sup>1</sup>, Karel Štamberg <sup>1</sup>, Ferdinand Šebesta <sup>1</sup>, Miroslav Šlouf <sup>2</sup> and Ján Kozempel <sup>1</sup>

<sup>1</sup> Faculty of Nuclear Sciences and Physical Engineering, Czech Technical University in Prague, Břehová 7, 115 19 Prague, Czech Republic

<sup>2</sup> Institute of Macromolecular Chemistry, Czech Academy of Sciences, Heyrovského náměstí 2, 162 06 Prague, Czech Republic

\* Correspondence: katerina.fialova@fjfi.cvut.cz; Tel.: +420 728 569 532

## Supplementary Information

### Dynamic light scattering analysis

For dynamic light scattering analysis Zetasizer NanoZS instrument, model ZEN3600 (Malvern Instruments) was used and the intensity-weighted hydrodynamic radius,  $R_H$ , scattering intensity, and zeta potential,  $\zeta$ , were measured. Repeated measurements at 25°C with scattering angle 173° were carried out. The concentration of cerium dioxide was 0.1 mg/ml in ultrapure water.

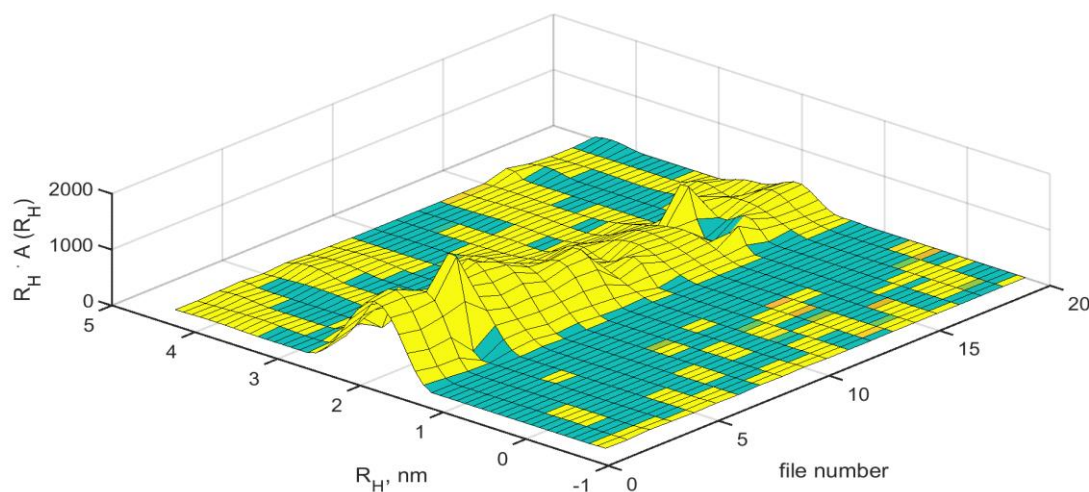

**Figure S1:** Intensity-weighted hydrodynamic radius distribution, repeated measurements

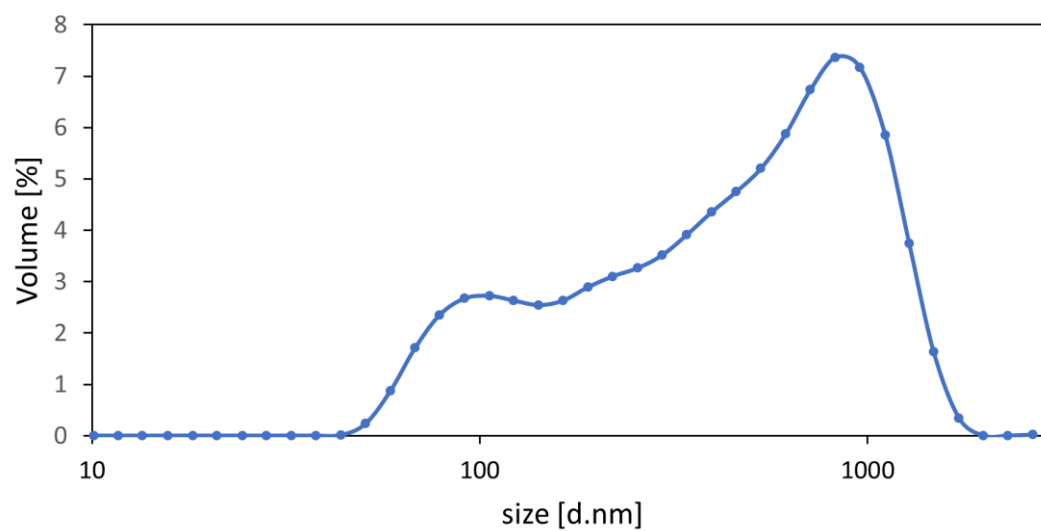

**Figure S2:** Volume distribution of cerium dioxide particle size
